# Supplementary material for: CRISPR-Cas12a-assisted nucleic acid detection
Source: PubMed Central journal article supplement (PMC5913299; doi:10.1038/s41421-018-0028-z), 2018-04-24
Supplement: 41421_2018_28_MOESM1_ESM.pdf [file 41421_2018_28_MOESM1_ESM.pdf]

## **Supplementary information**

### **Materials and Methods**

#### **Generation of dsDNA targets**

Template pUC18-T1 and primers (Target-T1-F and 1013-cexu-R) were used for the detection of HOLMES sensitivity in both Figure 1c and Supplementary Figure 1. To construct plasmid pUC18-T1, PCR amplification was performed with primers pUC18-T1-F and pUC18-T1-R (Supplementary Table S1), employing plasmid pUC18 as the template, and the PCR product was then self-ligated in the presence of T4 DNA ligase (Tolo Biotech.), T4 PNK (Tolo Biotech.) and DpnI (NEB). In Supplementary Figure S2, target fragments were amplified with 1260(R) and its single-point mismatch primer (Supplementary Table S1) with pUC18-T1 as the template, followed by the purification and dilution of the fragments to the same concentration (50 ng/ $\mu$ L).

#### **Transcription of crRNAs**

The transcription templates were prepared through annealing of the synthesized oligonucleotides with T7-crRNA-F (Supplementary Table S2), following the same procedures as previously described<sup>1,2</sup>. Then, crRNAs were synthesized using a T7 High Yield Transcription Kit (Thermo Fisher Scientific), and the reaction was performed at 37 °C overnight (approximately 16 h). RNA was purified using the RNA Clean & Concentrator<sup>TM</sup>-5 (Zymo Research) and quantified with the NanoDrop 2000C (Thermo Fisher Scientific).

#### **Extraction of genomic DNA, viral DNA and viral RNA**

HEK293T cells were grown at 37 °C under 5% CO<sub>2</sub> atmosphere in Dulbecco's modified Eagle's

medium (Invitrogen, Carlsbad, CA, USA) supplemented with 10% heat-inactivated foetal calf serum (FCS). Genomic DNA of HEK293T cells was extracted by using TIANamp Genomic DNA Kit (TIANGEN Biotech), and 10 ng of DNA was used for PCR reactions. PRV DNA virus or JEV RNA virus was extracted from viral fluids using the MiniBEST viral RNA/DNA Extraction kit (TaKaRa) according to the manufacturer's protocol.

### **HOLMES method**

#### (1) PCR

PCRs were performed by KOD FX (ToYoBo) with the primers listed in Supplementary Table S1, and 1 nM purified DNA or 1  $\mu$ L of saliva sample was used as the template, following the program: initial denaturation at 95 °C for 2 min, then 98 °C for 10 s, 60 °C 10 s, and 68 °C 10 s for 35 cycles. For the RNA virus (JEV), the first-strand cDNA was synthesized with reverse transcription using PrimeScript™ 1st Strand cDNA Synthesis Kit (TaKaRa) with a random hexanucleotide primer before being employed for PCR amplification.

#### (2) Cas12a detection

LbCas12a was used for the HOLMES cleavage assays unless mentioned otherwise. Cas12a detection was performed at 37 °C in NEB buffer 3 or 3.1 for 15 min, employing 250 nM Cas12a, 500 nM synthesized crRNA, target DNA (unless stated, 10 ng purified or 1  $\mu$ L PCR reaction mixture), 500 nM collateral ssDNA (quenched fluorescent DNA reporter HEX-N12-BHQ1) and 10 U RNase inhibitor (TaKaRa) in a 20- $\mu$ L volume. Reactions were stopped by heating at 98 °C for 2 min. Fluorescence emission was excited at 535 nm and detected at 556 nm using a Varioskan Flash from Thermo Fisher Scientific, and reactions with no target DNA were taken as the background.

### (3) Optimization of crRNA guide sequences in SNP detection

Target T1 was employed for single nucleotide mutation analysis, and was point mutated in regions including both the PAM sequence and the 1<sup>st</sup> -18<sup>th</sup> base positions of the guide sequence. Signals between the wild-type and mutated T1 sequences were compared using crRNAs of different guide lengths. Considering the overall signal intensity and the difference between the wild-type and the mutated sequences, we employed crRNAs with 15-nt to 17-nt guide sequences for SNP detection in this study. Specifically, crRNAs with 17-nt guide sequences were first tested for their ability to discriminate single-base mismatches. If they did not work, then 16-nt (or even 15-nt) guide sequences were tested.

#### **Real-time PCR**

The sensitivity of the real-time PCR method with SYBR Green was tested by the SYBR® Premix Ex Taq™ II reaction mixture (TaKaRa), using a dilution series of pUC18 plasmid as the template. The assay was performed with the Real-Time PCR System (StepOne Plus from Thermo Fisher Scientific).

To quantitate the DNA virus or RNA viruses using the real-time method, fragments of gD111 and E117 were first amplified from DNA and RNA viruses, using primers of gD111-F/gD111-R and E117-F/E117-R, respectively. The concentration of amplification products were determined by a NanoDrop spectrophotometer, which were then diluted to different concentrations and used as the templates to prepare the standard curves by real-time PCR with SYBR Green II. The extracted genomic DNA or reverse-transcribed cDNA was then quantitated by real-time PCR, using these standard curves.

**Supplementary Table S1. Oligonucleotides used for preparation of cleavage templates in this study**

| <b>Oligo names</b> | <b>Sequences (5'-3')</b>                          |
|--------------------|---------------------------------------------------|
| pUC18-T1-F         | tttactgaattcgggtcatagctgttcctgtgtga               |
| pUC18-T1-R         | gttgcgataacaaaactggccgctgtttacaacgtc              |
| 1260(R)            | tgtagccgtagttaggccaccactca                        |
| Target-T1-F        | agtttgttatcgcaactttctactgaattc                    |
| 1013-cexu-R        | ttctgtggataaccgtattaccgc                          |
| Target-T1-F-1A     | agtttgAtatcgcaactttctactgaattc                    |
| Target-T1-F-2A     | agtttgTaatcgcaactttctactgaattc                    |
| Target-T1-F-3T     | agtttgTtcgcaactttctactgaattc                      |
| Target-T1-F-4A     | agtttgTtaAcgcaactttctactgaattc                    |
| Target-T1-F-5G     | agtttgTtatGgcaactttctactgaattc                    |
| Target-T1-F-6C     | agtttgTtataCcaactttctactgaattc                    |
| Target-T1-F-7G     | agtttgTtatcgGaactttctactgaattc                    |
| Target-T1-F-8T     | agtttgTtatcgcTactttctactgaattc                    |
| Target-T1-F-9T     | agtttgTtatcgcaTctttctactgaattc                    |
| Target-T1-F-10G    | agtttgTtatcgcaaGtttctactgaattc                    |
| Target-T1-AAAN-F   | aaaagttatcgcaactttctactgaattc                     |
| Target-T1-F-11A    | agtttgTtatcgcaacAttctactgaattcgggtcatag           |
| Target-T1-F-12A    | agtttgTtatcgcaactAtctactgaattcgggtcatag           |
| Target-T1-F-13A    | agtttgTtatcgcaactActactgaattcgggtcatag            |
| Target-T1-F-14G    | agtttgTtatcgcaacttGtactgaattcgggtcatag            |
| Target-T1-F-15A    | agtttgTtatcgcaacttAcactgaattcgggtcatag            |
| Target-T1-F-16T    | agtttgTtatcgcaacttctTctgaattcgggtcatag            |
| Target-T1-F-17G    | agtttgTtatcgcaacttctaGtgaattcgggtcatag            |
| Target-T1-F-18A    | agtttgTtatcgcaactttctacAgaattcgggtcatag           |
| Target-T1-PAM1A-F  | agtttAgttatcgcaactttctactgaattc                   |
| Target-T1-PAM2A-F  | agttAtgttatcgcaactttctactgaattc                   |
| Target-T1-PAM3A-F  | agtAttgttatcgcaactttctactgaattc                   |
| rs5082-F           | ctgcctttgcttctaccttgcctgt                         |
| rs5082-F-T         | ttgcttctaccttgcctgttctgg                          |
| rs5082-R           | ttttctggctggggatggccgatgg                         |
| rs1467558-F        | agcaataacactaatattgattccttcagatatggactccttcatagta |
| rs1467558-F-T      | ttgattccttcagatatggactccttcatagtataacg            |
| rs1467558-R        | tgagcatcgttattcttacgcgttgctcattgaaagag            |
| rs2952768-F        | agcctgggcaacgagtgaaactctg                         |
| rs2952768-R        | acaggagggacaaggcctaagtgtcc                        |
| rs2952768-R-C      | catcataggattgggaaaaggacatttcagtcattcag            |
| rs4363657-F        | agagtcctcttttcaattttcagaataatttagtactttgggtac     |
| rs4363657-R        | cagtactgaaaaaacctgcctatcaataaaagccctagac          |
| rs601338-F         | gcttcaccggctaccttgcctct                           |
| rs601338-R         | ttcactgcaggccccgcagg                              |
| rs6869366-F        | tgaaactcacttcgtagctctgcaactttgtact                |
| rs6869366-F-G      | ttcgtagctctgcaactttgtactgttgc                     |

|                |                                                      |
|----------------|------------------------------------------------------|
| rs6869366-R    | agacttagtgattgtttctataataataagtacataaattagacataggtgg |
| rs10034228-F   | gactgtggttatgaggggaagaagtcagagatttga                 |
| rs10034228-F-C | ttatgaggggaagaagtcagagattgtactttgtagtg               |
| rs10034228-R   | gtgtggcctccatggaacacagcg                             |
| rs9939609-F    | ctaggtccttgcgactgcttgaatt                            |
| rs9939609-F-A  | ttccttgcgactgcttgaatttagtgatgc                       |
| rs9939609-R    | atggcttcagggtaccagctatttcatttcag                     |
| rs838133-F     | acgagaccgggttcgagcttccagg                            |
| rs838133-F-A   | agaccgggttcgagcttccaggactg                           |
| rs838133-R     | gtgtagaggtaccgctgccgacttg                            |
| rs17070145-F   | ccagctgctccttgatcttgacct                             |
| rs17070145-R   | tgcacagtgggttggcagatggaacc                           |
| rs6265-F       | cgaactttctggtcctcatccaacagctttctatca                 |
| rs6265-F-T     | ttctgctcctcatccaacagctttctatcatgtgtc                 |
| rs6265-R       | aaggtggcttggcctaccaggtg                              |
| rs1014290-F    | agttccagacctcagtcacaagatactttctac                    |
| rs1014290-F-G  | acctcagtcacaagatactttctacgtatccac                    |
| rs1014290-R    | agctccagtggatggaagatcttgatccag                       |
| rs737267-F     | ttctgaacccaaactcacctggcatttaactg                     |
| rs737267-F-T   | aaactcacctggcatttaactgtctctgtaag                     |
| rs737267-R     | tgccgaggctgagttcagctactctcc                          |
| rs642803-F     | ccccggctctgttgcttggagaattg                           |
| rs642803-F-C   | ctctgttgcttggagaattgcctgtctgtgtc                     |
| rs642803-F-T   | ctctgttgcttggagaattgtctgtctgtgtc                     |
| rs642803-R     | accgatacctggcagcccttgatg                             |
| E117-F         | aagcgagctgatagtagctatgtgtgcaacaag                    |
| E117-R         | atgtttctgctggattgtctccaatcgc                         |
| E138-F         | gcgattgggagaacaatccagccagaaaacatttaatac              |
| E138-R         | aaggagcattgggtgtactgtaaacttggccg                     |
| gD111-F        | ggtgctgcacacctgtgtactttatc                           |
| gD111-R        | accatgagcagccccagctcgt                               |
| gE46-F         | gagtcctcggccgaagtTtgggac                             |
| gE46-R         | gaagttggcgcctcggacacgttca                            |
| HEX-N12-BHQ1   | HEX-NNNNNNNNNNNNN-BHQ1                               |

**Supplementary Table S2. Oligonucleotides used for preparation of transcription templates in this study**

| Oligo names | Sequences (5'-3')                                                         |
|-------------|---------------------------------------------------------------------------|
| T7-crRNA-F  | GAAATTAATACGACTCACTATAGGG                                                 |
| T7-T1-24-R  | gaattcagtagaaaagttgcgataaATCTACAACAGTAGAAATCCCTATAGT<br>GAGTCGTATTAATTTTC |
| T7-T1-15-R  | agaaaagttgcgataaATCTACAACAGTAGAAATCCCTATAGTGAGT<br>CGTATTAATTTTC          |

|                                |                                                                    |
|--------------------------------|--------------------------------------------------------------------|
| T7-T1-16-R                     | tagaaagttgcgataaATCTACAACAGTAGAAATTCCTATAGTGAG<br>TCGTATTAATTTTC   |
| T7-T1-17-R                     | gtagaaagttgcgataaATCTACAACAGTAGAAATTCCTATAGTGAG<br>TCGTATTAATTTTC  |
| T7-T1-18-R                     | agtagaaagttgcgataaATCTACAACAGTAGAAATTCCTATAGTGA<br>GTCGTATTAATTTTC |
| T7-crRNA-rs5082-T              | CCTCTTCCCAGAACAGGATCTACAACAGTAGAAATTCCTAT<br>AGTGAGTCGTATTAATTTTC  |
| T7-crRNA-rs5082-G              | CCTCTTCCCAGCACAGGATCTACAACAGTAGAAATTCCTAT<br>AGTGAGTCGTATTAATTTTC  |
| T7-crRNA- rs1467558-T          | CTGAAGCGTTATACTATATCTACAACAGTAGAAATTCCTATA<br>GTGAGTCGTATTAATTTTC  |
| T7-crRNA- rs1467558-C          | CTGAAGCGTTGTACTATATCTACAACAGTAGAAATTCCTATA<br>GTGAGTCGTATTAATTTTC  |
| T7-crRNA-rs2952768-T-<br>16nt  | TTTTATCTGAATGATTATCTACAACAGTAGAAATTCCTATAG<br>TGAGTCGTATTAATTTTC   |
| T7-crRNA-rs2952768-C-<br>16nt  | TTTTATCTGAATGACTATCTACAACAGTAGAAATTCCTATAG<br>TGAGTCGTATTAATTTTC   |
| T7-crRNA-rs4363657-T           | AAAAAAGAGTGAGTACCATCTACAACAGTAGAAATTCCTAT<br>AGTGAGTCGTATTAATTTTC  |
| T7-crRNA-rs4363657-C           | AAAAAAGAGTGGGTACCATCTACAACAGTAGAAATTCCTAT<br>AGTGAGTCGTATTAATTTTC  |
| T7-crRNA-rs601338-G            | GGTAGAAGGTCCAGGAGATCTACAACAGTAGAAATTCCTAT<br>AGTGAGTCGTATTAATTTTC  |
| T7-crRNA-rs601338-A            | GGTAGAAGGTCTAGGAGATCTACAACAGTAGAAATTCCTAT<br>AGTGAGTCGTATTAATTTTC  |
| T7-crRNA-rs6869366-G           | TTGGGATGTCAACAGTAATCTACAACAGTAGAAATTCCTAT<br>AGTGAGTCGTATTAATTTTC  |
| T7-crRNA-rs6869366-T           | TTGGGATGTCAAAAGTAATCTACAACAGTAGAAATTCCTAT<br>AGTGAGTCGTATTAATTTTC  |
| T7-crRNA-rs10034228-T-<br>16nt | CCACACTAACAAAATAATCTACAACAGTAGAAATTCCTATA<br>GTGAGTCGTATTAATTTTC   |
| T7-crRNA-rs10034228-C-<br>16nt | CCACACTAACAAAGTAATCTACAACAGTAGAAATTCCTATA<br>GTGAGTCGTATTAATTTTC   |
| T7-crRNA-rs9939609-A           | AAGTGCATCACTAAATTATCTACAACAGTAGAAATTCCTATA<br>GTGAGTCGTATTAATTTTC  |
| T7-crRNA-rs9939609-T           | AAGTGCATCACAAAATTATCTACAACAGTAGAAATTCCTAT<br>AGTGAGTCGTATTAATTTTC  |
| T7-crRNA-rs838133-A            | CAGAAACCCACAGTCCTATCTACAACAGTAGAAATTCCTAT<br>AGTGAGTCGTATTAATTTTC  |
| T7-crRNA-rs838133-G            | CAGAAACCCACAGCCCTATCTACAACAGTAGAAATTCCTAT<br>AGTGAGTCGTATTAATTTTC  |
| T7-crRNA-rs17070145-C          | TCAGGAACAGTTGAGGTATCTACAACAGTAGAAATTCCTAT<br>AGTGAGTCGTATTAATTTTC  |

|                               |                                                                        |
|-------------------------------|------------------------------------------------------------------------|
| T7-crRNA-rs17070145-T         | TCAGGAACAGTTAAGGTATCTACAACAGTAGAAATTCCTAT<br>AGTGAGTCGTATTAATTTTC      |
| T7-crRNA-rs6265-C             | CTTTCGAACACGTGATAATCTACAACAGTAGAAATTCCTATA<br>GTGAGTCGTATTAATTTTC      |
| T7-crRNA-rs6265-T             | CTTTCGAACACATGATAATCTACAACAGTAGAAATTCCTATA<br>GTGAGTCGTATTAATTTTC      |
| T7-crRNA-rs1014290-A-<br>16nt | GTCAGTGGATGATGTAATCTACAACAGTAGAAATTCCTATA<br>GTGAGTCGTATTAATTTTC       |
| T7-crRNA-rs1014290-G-<br>15nt | TCAGTGGATGACGTAATCTACAACAGTAGAAATTCCTATAG<br>TGAGTCGTATTAATTTTC        |
| T7-crRNA-rs737267-G-<br>16nt  | TCTTACAGAGCCAGTTATCTACAACAGTAGAAATTCCTATA<br>GTGAGTCGTATTAATTTTC       |
| T7-crRNA-rs737267-T           | GTCTTACAGAGACAGTTATCTACAACAGTAGAAATTCCTAT<br>AGTGAGTCGTATTAATTTTC      |
| T7-crRNA-rs1260326-C-<br>15nt | CTGGACTCTCACCGGATCTACAACAGTAGAAATTCCTATAG<br>TGAGTCGTATTAATTTTC        |
| T7-crRNA-rs1260326-T-<br>15nt | CTGGACTCTCACAGATCTACAACAGTAGAAATTCCTATAG<br>TGAGTCGTATTAATTTTC         |
| T7-crRNA-rs642803-C           | CACAGACAGGCAATTCTATCTACAACAGTAGAAATTCCTAT<br>AGTGAGTCGTATTAATTTTC      |
| T7-crRNA-rs642803-T           | CACAGACAGACAATTCTATCTACAACAGTAGAAATTCCTAT<br>AGTGAGTCGTATTAATTTTC      |
| T7-crRNA-E117-R               | ggaaggaagcattgacacatgATCTACAACAGTAGAAATTCCTATAG<br>TGAGTCGTATTAATTTTC  |
| T7-crRNA-E138-R-A             | aaatgccaactTgtatATCTACAACAGTAGAAATTCCTATAGTGAGT<br>CGTATTAATTTTC       |
| T7-crRNA-E138-R-G             | aaatgccaactcgatATCTACAACAGTAGAAATTCCTATAGTGAGT<br>CGTATTAATTTTC        |
| T7-crRNA-gD111-R              | tggggtcgcagtcgctactcgaATCTACAACAGTAGAAATTCCTATAG<br>TGAGTCGTATTAATTTTC |
| T7-crRNA-gE46-R               | cctcgtggagaggtccATCTACAACAGTAGAAATTCCTATAGTGAG<br>TCGTATTAATTTTC       |
| T7-crRNA-gE46-R-GAC           | cgggtggagagGTCgtccATCTACAACAGTAGAAATTCCTATAGTGA<br>GTCGTATTAATTTTC     |

**Supplementary Table S3. Sequences of Cas12a proteins used in this study**

| <b>Name</b> | <b>GI number</b> | <b>Species</b>                          |
|-------------|------------------|-----------------------------------------|
| FnCas12a    | 489130501        | <i>Francisella tularensis</i>           |
| AsCas12a    | 545612232        | <i>Acidaminococcus sp.</i> BV3L6        |
| LbCas12a    | 917059416        | <i>Lachnospiraceae bacterium</i> ND2006 |
| Lb5Cas12a   | 652820612        | <i>Lachnospiraceae bacterium</i> NC2008 |
| HkCas12a    | 491540987        | <i>Helcococcus kunzii</i> ATCC 51366    |
| OsCas12a    | 909652572        | <i>Oribacterium sp.</i> NK2B42          |
| TsCas12a    | 972924080        | <i>Thiomicrospira sp.</i> XS5           |

|           |           |                                                |
|-----------|-----------|------------------------------------------------|
| BbCas12a  | 987324269 | <i>Bacteroidales bacterium</i> KA00251         |
| BoCas12a  | 496509559 | <i>Bacteroidetes oral taxon</i> 274 str. F0058 |
| Lb4Cas12a | 769130406 | <i>Lachnospiraceae bacterium</i> MC2017        |

**Supplementary Table S4. SNP variants tested with HOLMES genotyping**

| ID         | Gene       | Category                                     |
|------------|------------|----------------------------------------------|
| rs5082     | APOA2      | Saturated fat consumption and weight gain    |
| rs1467558  | CD44       | Acetaminophen metabolism                     |
| rs2952768  | near CREB1 | Morphine dependence                          |
| rs4363657  | SLCO1B1    | 4.5x increase myopathy risk for statin users |
| rs601338   | FUT2       | Resistance to norovirus                      |
| rs6869366  | TMEM167A   | risk for bladder cancer                      |
| rs10034228 |            | risk for pathological myopia                 |
| rs9939609  | FTO        | triggers obesity and type-2 diabetes         |
| rs838133   | FGF21      | Higher odds of preferring candy              |
| rs17070145 | WWC1       | greatly increased memory performance         |
| rs6265     | BDNF       | brain-derived neurotrophic factor BDNF gene  |
| rs1014290  | SLC2A9     | risk for gout                                |
| rs737267   | SLC2A9     | risk for gout                                |
| rs642803   | OVOL1      | risk for gout                                |



## Supplementary Figures

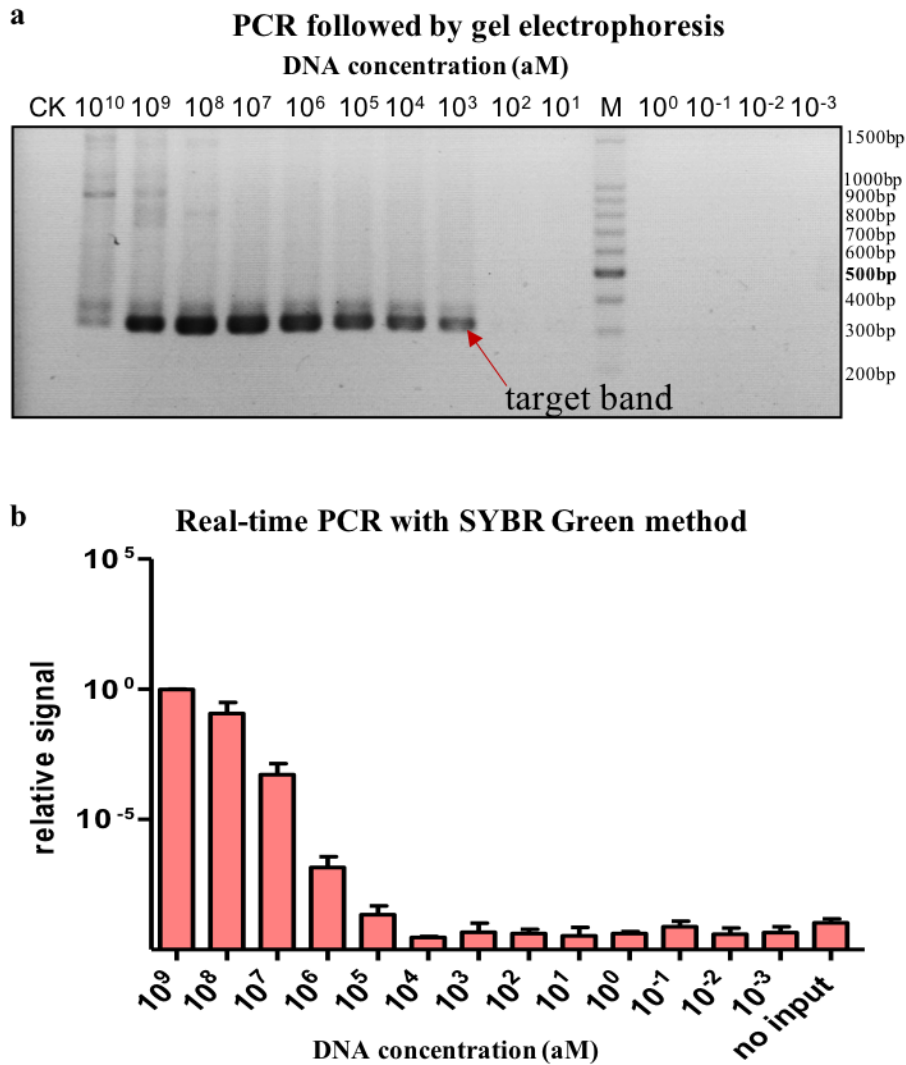

**Supplementary Figure S1. Determination of the sensitivity of different nucleic acid detection methods.** **a**, Determination of the sensitivity of PCR amplification. Serially diluted dsDNA (pUC18-T1) was used as the template, and the PCR products were analysed by gel electrophoresis and subsequent ethidium bromide staining. The same PCR-amplified samples were used to determine the HOLMES sensitivity (Figure 1c). The minimum detection concentration for PCR amplification by the KOD FX (ToYoBo) was  $10^3$  aM in this study. **b**, Determination of the sensitivity of quantitative PCR with the SYBR Green method. Serially diluted dsDNA (pUC18-T1) was used as the template. The minimum detection concentration for quantitative PCR with SYBR® Premix Ex Taq™ II (TaKaRa) was  $10^5$  aM in this study. (n=3 technical replicates; bars represent the mean  $\pm$  SEM)

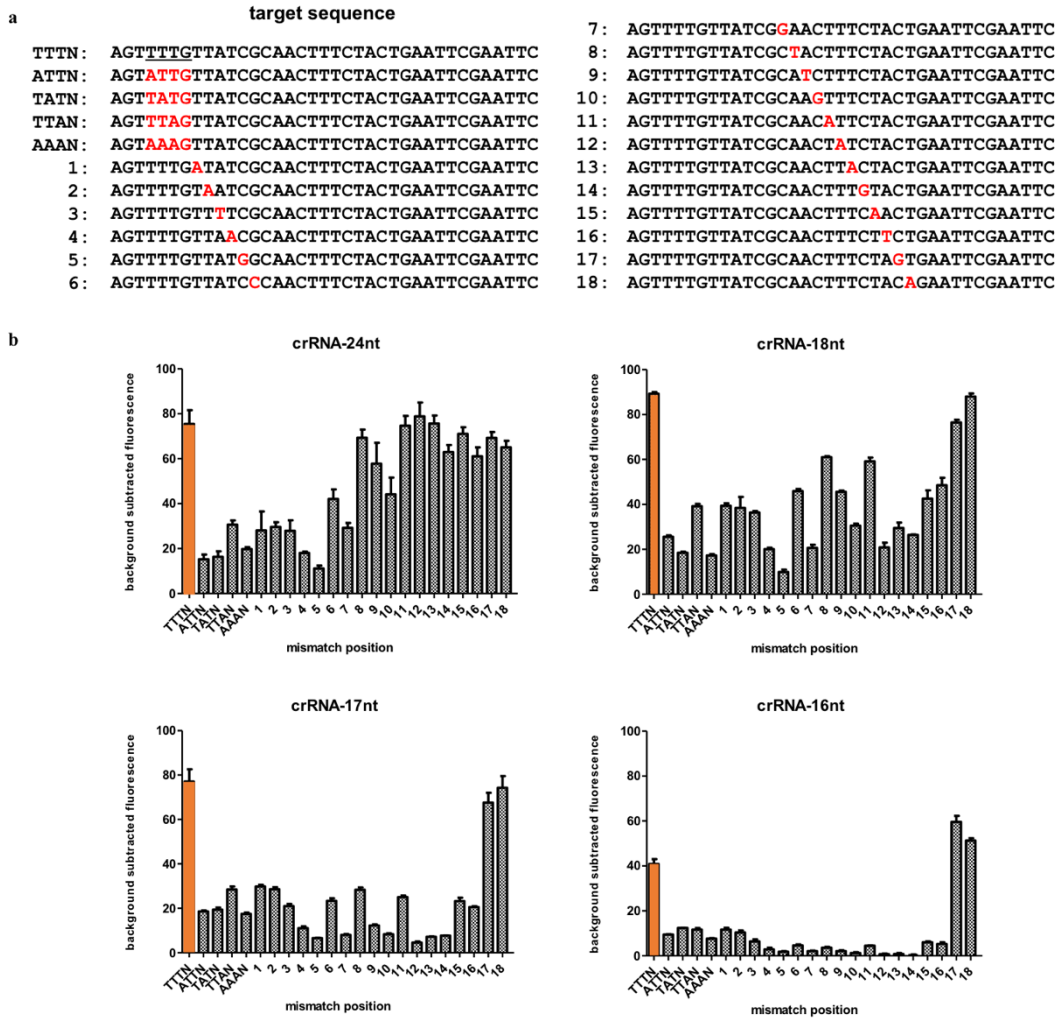

**Supplementary Figure S2. Comparative analysis of the signal-to-noise of single-base mismatch with crRNAs of different guide lengths.** **a**, Representation of target sequences in Supplementary Figure S2b. Target-T1 was employed for analysis. The PAM sequence in the wild type (“TTTN”) was underlined, while mutated sequences were shown in red. **b**, Comparative analysis of the detection signal among target-T1 and its mutants shown above. crRNAs with different lengths of guide sequences were used. A quenched fluorescent DNA probe (HEX-N12-BHQ1) was incubated with the Cas12a reaction system, including LbCas12a, a non-mutated target-T1 (“TTTN”), a mutated PAM (“ATTN”, “TATN”, “TTAN” or “AAAN”) or a sequence with a single base mutation from the 1<sup>st</sup> to the 18<sup>th</sup> base (No. 1-18) as the target sequence, and crRNAs with different lengths of guide sequences (*i.e.* crRNA-16nt, crRNA-17nt, crRNA-18nt, and crRNA-24nt) ( $n=3$  technical replicates; bars represent the mean  $\pm$  SEM). When the 24-nt crRNA complementary guide sequence (crRNA-24nt) was used, no difference was observed between the wild-type and single-base mutants altered in the region from the 8<sup>th</sup> -18<sup>th</sup> base positions; however, for the PAM mutants and mutants in region of the 1<sup>st</sup> -7<sup>th</sup> base positions, the fluorescence signal clearly

declined. When shorter guide lengths were used (*i.e.* 16-18 nt), the signals for wild-type and mutated targets differed more greatly. When 15-nt guide sequence was used, the HOLMES signals were very weak for target-T1 (data not shown), but were not for other targets, indicating the different characteristics among different crRNA guide sequences.

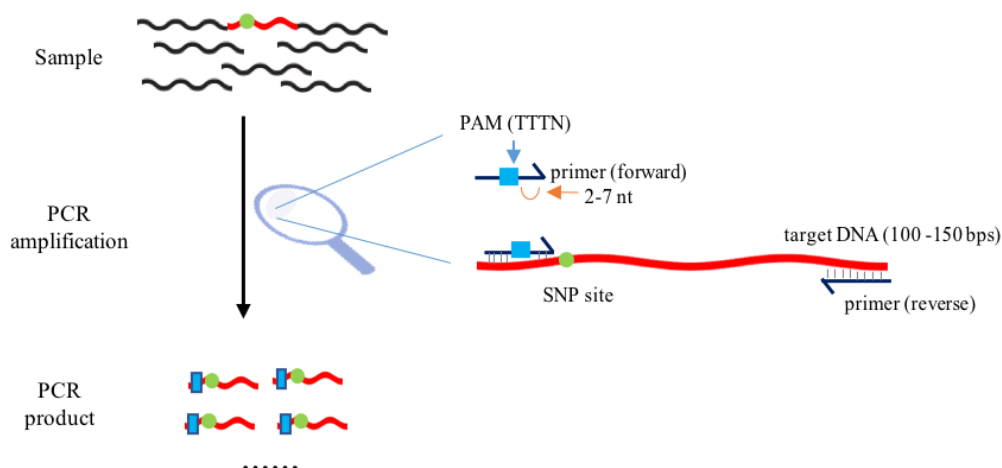

**Supplementary Figure S3. Schematic of the primer design for SNP detection with HOLMES.**

Primers were usually designed to make sure that the SNP site located in the seed region (*i.e.* the first 8 nts) of the guide sequence. The PAM sequence (“TTTN”) was contained in the primers and introduced into the target sequences through PCR amplification, enabling HOLMES to detect any SNP sites in a sequence-independent manner. Notably, the 3'-end pairing between the forward primer and the template was necessary for the successful amplification of the target region. Moreover, the length of the guide sequence in crRNA could be adjusted to achieve larger differences in fluorescence signals between different polymorphisms.

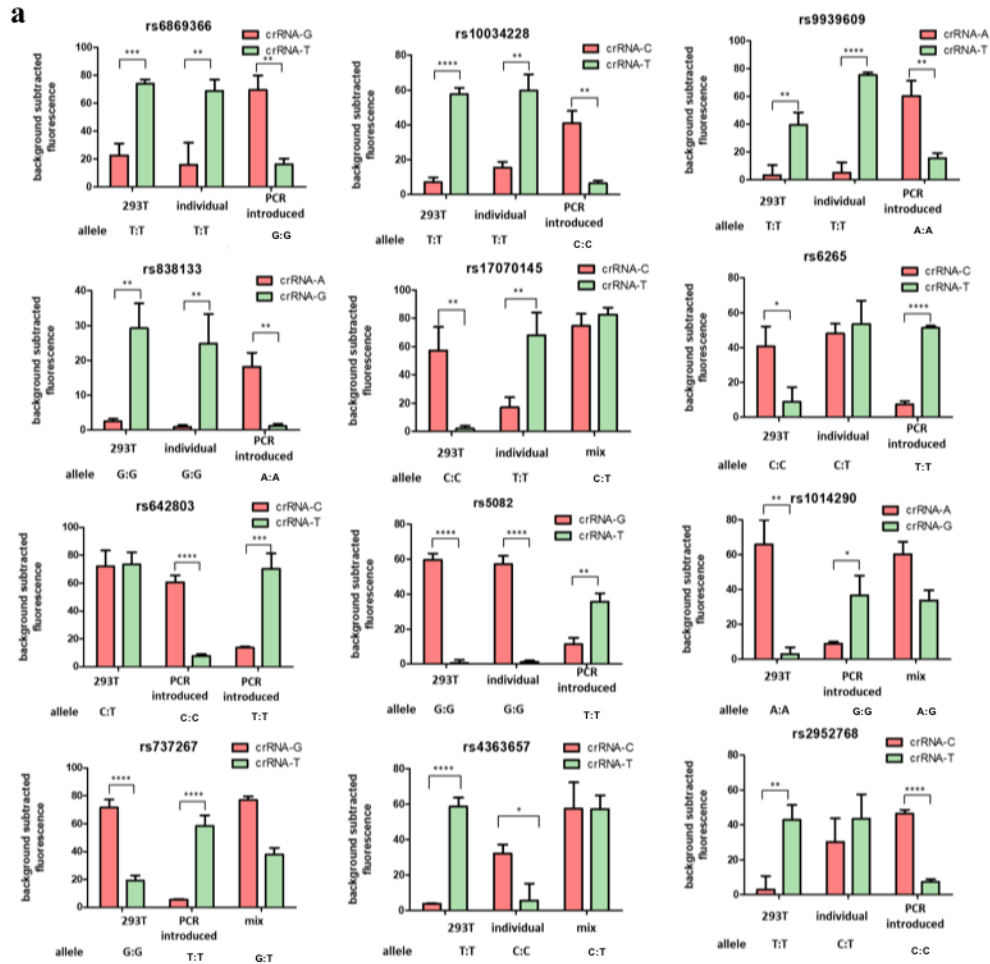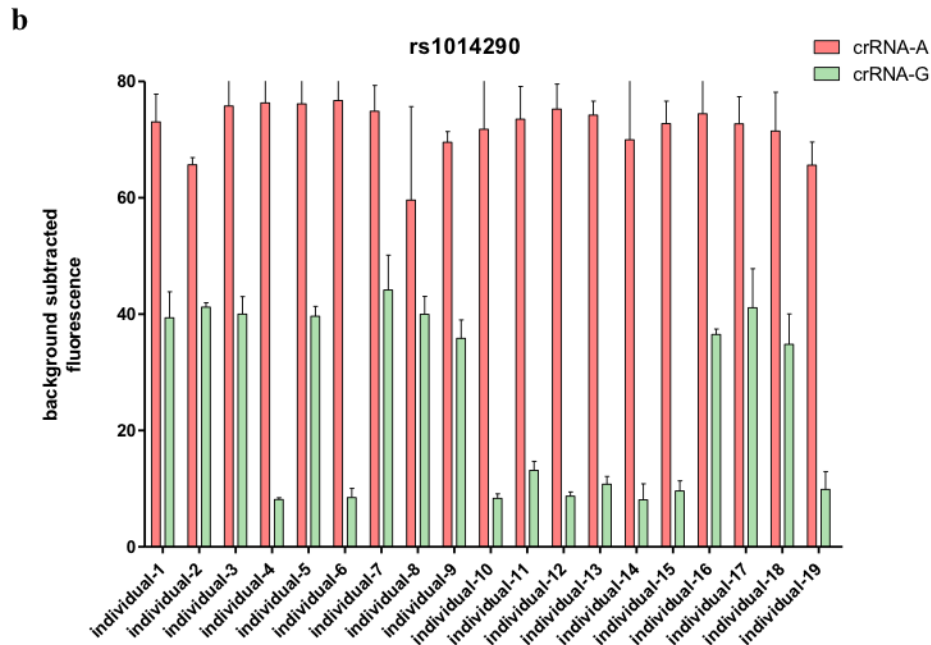

Supplementary Figure S4. Human SNP genotyping with HOLMES. a, HOLMES correctly genotyped 12 different SNP sites in the human genome. Genotypes verified by Sanger sequencing were

annotated below each plot. If the individual genotype was the same as that of HEK 293T, PCR amplification was employed to introduce a distinct genotype at the locus; otherwise, the PCR products of HEK 293T and the individual were mixed to mimic a heterozygous genotype. (n=3 technical replicates; two-tailed Student's t test; \*,  $p < 0.05$ ; \*\*,  $p < 0.01$ ; \*\*\*,  $p < 0.001$ ; \*\*\*\*,  $p < 0.0001$ ; bars represent the mean  $\pm$  SEM) **b**, Detection of an SNP site (rs1014290) involved in the gout risk in 19 volunteers. A mixed SNP template mimicking a heterozygous genotype was employed as the control. As the signal value for crRNA-G with the mixed template of rs1014290 was obviously lower than that of crRNA-A (also see Figure S4a), signals for individuals were statistically analyzed with the control signal using the same type of crRNA (n=3 technical replicates; bars represent the mean  $\pm$  SEM; two-tailed Student's t test; \*\*,  $p < 0.01$ ). Based on the HOLMES results, the genotype of volunteers 4, 6, 10-15 and 19 was A:A, while the rest was A:G, which was consistent with the Sanger sequencing results. This study was approved by the Biomedical Research Ethics Committee of SIBS, CAS, and only healthy human volunteers were used in this study.

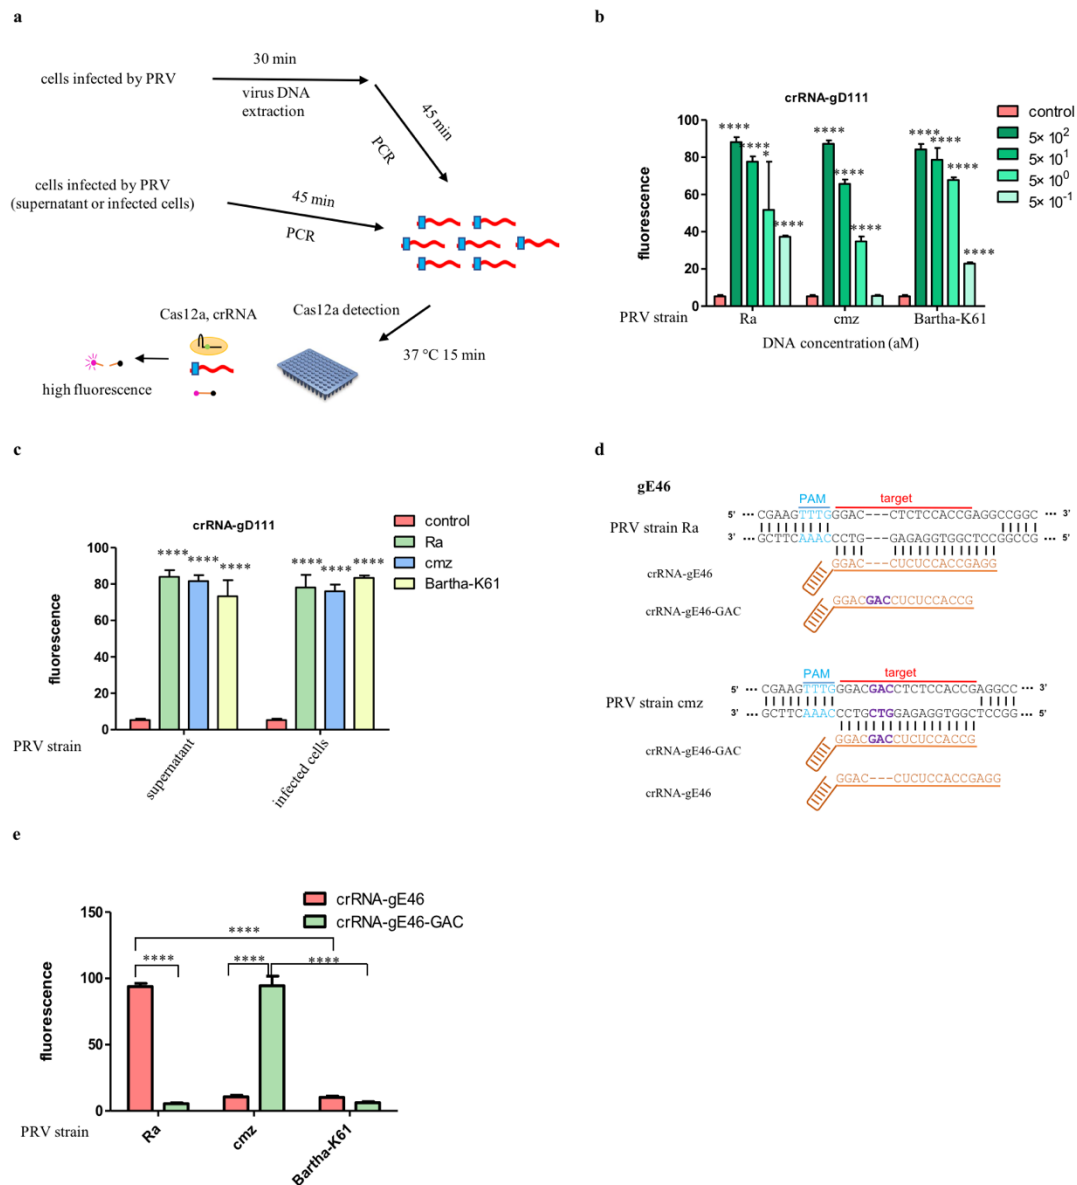

**Supplementary Figure S5. Application of HOLMES in PRV virus detection.** **a**, Schematic of PRV DNA virus detection by HOLMES. **b**, HOLMES detected PRV viruses with high sensitivity. **c**, HOLMES was of high sensitivity, and successfully detected PRV viruses in both the PRV-infected cells and the culture supernatant. **d**, Schematic of the target region in PRV strains and the crRNA sequences used for detection. Strain cmz had a small insertion of “GAC” in the region, which was shown in purple; whereas the Bartha-K61 vaccine strain lacked this target region. PAM sequences indicated in blue were introduced by PCR amplification with primers containing the PAM sequences, using the strategy illustrated in Supplementary Figure S3. **e**, Discrimination of the PRV Ra, CM and Bartha-K61 vaccine strains by HOLMES based on the strain SNPs. (n=3 technical replicates, two-tailed Student t test; \*\*\*\*,  $p < 0.0001$ ; bars represent mean  $\pm$  SEM)

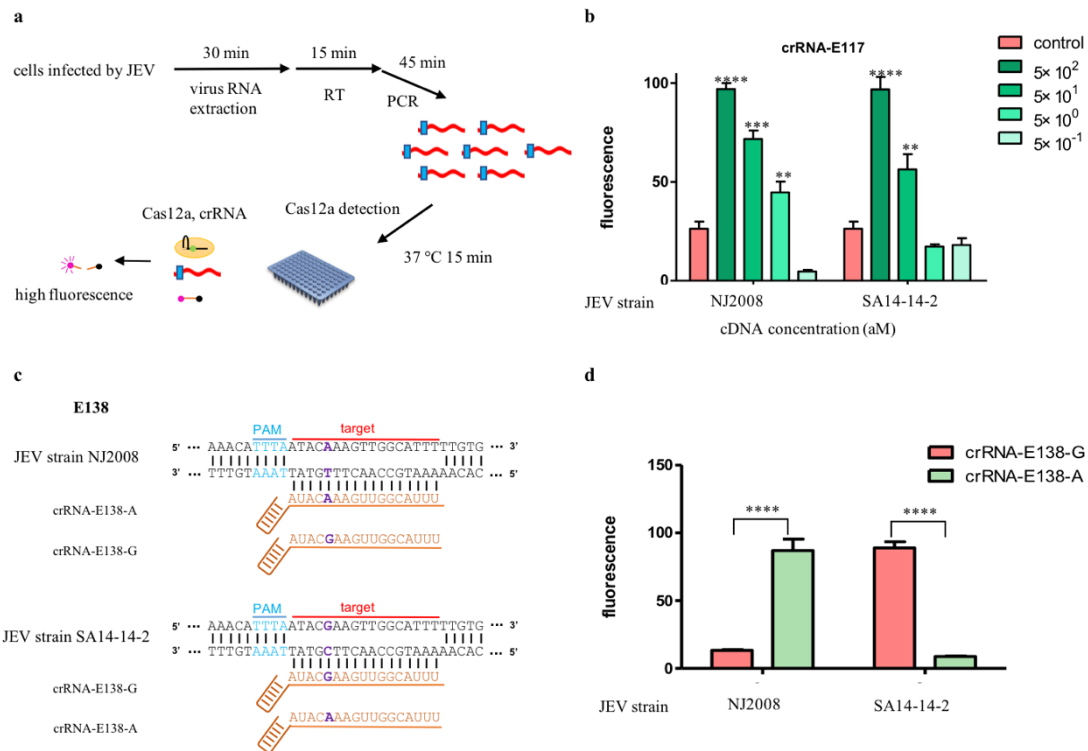

**Supplementary Figure S6. Application of HOLMES in JEV virus detection.** **a**, Schematic of JEV RNA virus detection by HOLMES. **b**, HOLMES detected JEV viruses with high sensitivity. **c**, Schematic of the targeted region in JEV strains and the crRNA sequences used for detection. SNPs in the target were coloured purple. PAM sequences introduced by PCR amplification were coloured in blue. **d**, Discrimination of JEV NJ2008 and SA14-14-2 strains by HOLMES based on the strain SNPs. (n=3 technical replicates; two-tailed Student's t test; \*\*\*\*,  $p < 0.0001$ ; bars represent the mean  $\pm$  SEM)

## REFERENCES

- 1 Li, S. Y., Zhao, G. P. & Wang, J. C-Brick: A New Standard for Assembly of Biological Parts Using Cpf1. *ACS Synth Biol* **5**, 1383-1388 (2016).
- 2 Lei, C. *et al.* The CCTL (Cpf1-assisted Cutting and Taq DNA ligase-assisted Ligation) method for efficient editing of large DNA constructs in vitro. *Nucleic Acids Res*, **45**, e74 (2017).
